# Supplementary material for: Short- and Branched-Chain Fatty Acids as Fecal Markers for Microbiota Activity in Vegans and Omnivores
Source: MDPI journal article supplement (doi:10.3390/nu13061808), 2021-05-26
Supplement: s1 [file s1]

**Supplementary Table S1.** Within-in sample diversity in vegans and omnivores of RBVD study.

| <b>Taxonomic Level</b> | <b>Vegans</b>  | <b>Omnivores</b> | <b><i>p</i>-Value</b> |
|------------------------|----------------|------------------|-----------------------|
| <b>Phylum</b>          |                |                  |                       |
| number of phyla        | 9.9 (± 1.9)    | 9.5 (± 1.9)      | 0.4                   |
| Pielou's evenness      | 0.39 (± 0.06)  | 0.41 (± 0.07)    | 0.3                   |
| Shannon diversity      | 0.89 (± 0.12)  | 0.90 (± 0.12)    | 0.6                   |
| Simpson diversity      | 0.52 (0.06)    | 0.52 (± 0.06)    | 0.6                   |
| <b>Class</b>           |                |                  |                       |
| number of classes      | 20.2 (± 2.7)   | 19.8 (± 2.6)     | 0.5                   |
| Pielou's evenness      | 0.37 (± 0.5)   | 0.37 (± 0.5)     | 0.6                   |
| Shannon diversity      | 1.10 (± 0.15)  | 1.11 (± 0.14)    | 0.8                   |
| Simpson diversity      | 0.57 (± 0.07)  | 0.57 (± 0.06)    | 1                     |
| <b>Family</b>          |                |                  |                       |
| number of families     | 66.3 (± 11.3)  | 67.5 (± 11.4)    | 0.1                   |
| Pielou's evenness      | 0.46 (± 0.07)  | 0.46 (± 0.05)    | 0.9                   |
| Shannon diversity      | 1.93 (± 0.32)  | 1.95 (± 0.26)    | 0.8                   |
| Simpson diversity      | 0.77 (± 0.10)  | 0.77 (± 0.07)    | 0.7                   |
| <b>Genus</b>           |                |                  |                       |
| number of genera       | 123.2 (± 23.4) | 123.2 (± 26.1)   | 0.3                   |
| Pielou's evenness      | 0.45 (± 0.08)  | 0.45 (± 0.07)    | 1                     |
| Shannon diversity      | 2.18 (± 0.43)  | 2.18 (± 0.38)    | 1                     |
| Simpson diversity      | 0.75 (± 0.12)  | 0.76 (± 0.09)    | 0.8                   |
| <b>Species</b>         |                |                  |                       |
| number of species      | 174.2 (± 35.4) | 172 (± 39.4)     | 0.8                   |
| Pielou's evenness      | 0.44 (± 0.12)  | 0.50 (± 0.10)    | 0.03                  |
| Shannon diversity      | 2.27 (± 0.62)  | 2.56 (± 0.58)    | 0.04                  |
| Simpson diversity      | 0.74 (± 0.16)  | 0.81 (± 0.12)    | 0.05                  |

Within-in sample diversity of gut microbiota between vegans and omnivores described by alpha-diversity indices. Data were presented as means (± standard deviation). Significance level was set at  $p \leq 0.05$ .

**Supplementary Table S2.** Abundances of taxa at phylum level in vegans and omnivores.

| Phylum                | Vegans                  | Omnivores             | <i>p</i> -Value | Vegans<br>(Max) | Omnivore<br>(Max) | Presence<br>(Vegan) | Presence<br>(Omnivore) |
|-----------------------|-------------------------|-----------------------|-----------------|-----------------|-------------------|---------------------|------------------------|
| Firmicutes            | 17357.5 (13550–22231.5) | 15603 (12928–18595.5) | 0.16            | 37648           | 43768             | 36                  | 36                     |
| Bacteroidetes         | 12127 (9552–16383)      | 12958 (8857–16517)    | 0.84            | 26267           | 42958             | 36                  | 36                     |
| Proteobacteria        | 426.5 (204–875.5)       | 544 (311–997.5)       | 0.21            | 4646            | 3810              | 36                  | 36                     |
| Actinobacteria        | 347.5 (133–677.5)       | 266 (143.5–555)       | 0.73            | 3643            | 11041             | 36                  | 36                     |
| Cyanobacteria         | 153 (96–250.5)          | 149.5 (96–200)        | 0.77            | 406             | 501               | 36                  | 36                     |
| Verrucomicrobia       | 32.5 (3–697)            | 40 (1.5–566)          | 0.61            | 4397            | 3775              | 35                  | 32                     |
| Fusobacteria          | 2 (1–4)                 | 2 (1–3.5)             | 0.44            | 15              | 28                | 32                  | 33                     |
| Synergistetes         | 2.5 (0.5–6.5)           | 2 (1–7)               | 0.88            | 102             | 34                | 27                  | 28                     |
| Tenericutes           | 13.5 (0–60)             | 1 (0–13.5)            | 0.02            | 253             | 98                | 26                  | 21                     |
| Euryarchaeota         | 0 (0–3)                 | 0 (0–0)               | 0.06            | 926             | 89                | 14                  | 7                      |
| Acidobacteria         | 0 (0–1)                 | 0 (0–1)               | 0.72            | 2               | 3                 | 13                  | 11                     |
| Lentisphaerae         | 0 (0–0)                 | 0 (0–0.5)             | 0.39            | 4               | 13                | 6                   | 9                      |
| Spirochaetes          | 0 (0–0)                 | 0 (0–0)               | 0.09            | 1               | 1                 | 5                   | 1                      |
| Nitrospinae           | 0 (0–0)                 | 0 (0–0)               | 0.30            | 6               | 1                 | 3                   | 1                      |
| Aquificae             | 0 (0–0)                 | 0 (0–0)               | 0.63            | 2               | 1                 | 3                   | 2                      |
| Armatimonadetes       | 0 (0–0)                 | 0 (0–0)               | 0.08            | 1               | 0                 | 3                   | 0                      |
| Balneolaeota          | 0 (0–0)                 | 0 (0–0)               | 0.25            | 2               | 2                 | 2                   | 5                      |
| Chloroflexi           | 0 (0–0)                 | 0 (0–0)               | 0.40            | 1               | 1                 | 2                   | 4                      |
| Chlorobi              | 0 (0–0)                 | 0 (0–0)               | 0.32            | 1               | 0                 | 1                   | 0                      |
| Chrysiogenetes        | 0 (0–0)                 | 0 (0–0)               | 1.00            | 1               | 1                 | 1                   | 1                      |
| Fibrobacteres         | 0 (0–0)                 | 0 (0–0)               | 1.00            | 1               | 1                 | 1                   | 1                      |
| Nitrospirae           | 0 (0–0)                 | 0 (0–0)               | 1.00            | 1               | 1                 | 1                   | 1                      |
| Deinococcus-Thermus   | 0 (0–0)                 | 0 (0–0)               | 1.00            | 1               | 1                 | 1                   | 1                      |
| Thermodesulfobacteria | 0 (0–0)                 | 0 (0–0)               | 1.00            | 1               | 1                 | 1                   | 1                      |
| Thermotogae           | 0 (0–0)                 | 0 (0–0)               | 1.00            | 1               | 1                 | 1                   | 1                      |
| Elusimicrobia         | 0 (0–0)                 | 0 (0–0)               | 0.15            | 0               | 92                | 0                   | 2                      |
| Deferribacteres       | 0 (0–0)                 | 0 (0–0)               | 0.32            | 0               | 1                 | 0                   | 1                      |

Median (Q1–Q3) abundances of phyla presented as number of reads resulting from 16S rRNA sequencing.

**Supplementary Table S3.** Abundances of taxa at species level in vegans and omnivores.

| Species                                 | Vegans               | Omnivores         | <i>p</i> -Value | Vegans<br>(Max) | Omnivore<br>(Max) | Presence<br>(Vegan) | Presence<br>(Omnivore) |
|-----------------------------------------|----------------------|-------------------|-----------------|-----------------|-------------------|---------------------|------------------------|
| <i>Akkermansia muciniphila</i>          | 31 (3–667)           | 37 (1–540.5)      | 0.426           | 4197            | 3591              | 35                  | 30                     |
| <i>Alistipes indistinctus</i>           | 17.5 (1–76)          | 27 (4–64.5)       | 0.257           | 565             | 504               | 27                  | 35                     |
| <i>Alistipes onderdonkii</i>            | 1 (0–12.5)           | 4 (1–30)          | 0.177           | 204             | 237               | 22                  | 28                     |
| <i>Alistipes putredinis</i>             | 9 (1.5–33)           | 22 (2–37)         | 0.175           | 114             | 87                | 28                  | 32                     |
| <i>Allisonella histaminiformans</i>     | 1 (0–1)              | 0 (0–1.5)         | 0.247           | 46              | 118               | 13                  | 8                      |
| <i>Alloprevotella rava</i>              | 1 (0–6)              | 1 (0–2)           | 0.619           | 2044            | 2941              | 19                  | 15                     |
| <i>Bacteroides coprocola</i>            | 10.5 (2–43.5)        | 17 (7–37.5)       | 0.132           | 2841            | 316               | 23                  | 19                     |
| <i>Bacteroides dorei</i>                | 31 (3–667)           | 37 (1–540.5)      | 0.398           | 314             | 147               | 32                  | 34                     |
| <i>Bacteroides fragilis</i>             | 23.5 (7–85.5)        | 30 (15–85.5)      | 0.237           | 2664            | 396               | 36                  | 35                     |
| <i>Bacteroides massiliensis</i>         | 4 (2–132.5)          | 5 (2–165)         | 0.599           | 1619            | 1998              | 31                  | 30                     |
| <i>Bacteroides ovatus</i>               | 23.5 (7–58)          | 23 (10–69.5)      | 0.562           | 682             | 344               | 35                  | 35                     |
| <i>Bacteroides plebeius</i>             | 1 (0–6.5)            | 0 (0–1.5)         | 0.121           | 3245            | 1063              | 19                  | 14                     |
| <i>Bacteroides uniformis</i>            | 12.5 (1.5–32.5)      | 35 (14–71)        | <b>0.004</b>    | 150             | 138               | 30                  | 33                     |
| <i>Bacteroides vulgatus</i>             | 9.5 (2.5–20)         | 17.5 (6–34.5)     | <b>0.070</b>    | 120             | 134               | 31                  | 34                     |
| <i>Barnesiella intestinihominis</i>     | 8.5 (1–27.5)         | 15 (3.5–30)       | 0.190           | 128             | 187               | 28                  | 32                     |
| <i>Barnesiella viscericola</i>          | 3 (0.5–6.5)          | 2 (0.5–5.5)       | 0.986           | 101             | 34                | 27                  | 27                     |
| <i>Bifidobacterium longum</i>           | 4.5 (1–15.5)         | 6 (0.5–17)        | 0.712           | 299             | 172               | 28                  | 27                     |
| <i>Butyricicoccus desmolans</i>         | 5.5 (2–35.5)         | 2 (1–18)          | <b>0.049</b>    | 182             | 88                | 33                  | 30                     |
| <i>Butyricimonas virosa</i>             | 0 (0–2)              | 0.5 (0–5)         | 0.134           | 4               | 26                | 17                  | 11                     |
| <i>Butyrivibrio crossotus</i>           | 0 (0–1)              | 0.5 (0–1)         | 0.248           | 2335            | 1118              | 12                  | 18                     |
| <i>Clostridium colinum</i>              | 3 (0–12)             | 0 (0–1)           | <b>0.004</b>    | 125             | 73                | 22                  | 12                     |
| <i>Clostridium lactatifermentans</i>    | 1 (0–3)              | 2 (0–3.5)         | 0.321           | 25              | 414               | 23                  | 26                     |
| <i>Clostridium leptum</i>               | 7 (2.5–14.5)         | 9.5 (5–15)        | 0.245           | 259             | 92                | 34                  | 35                     |
| <i>Collinsella aerofaciens</i>          | 14 (3.5–31)          | 22 (4.5–43.5)     | 0.286           | 294             | 722               | 29                  | 30                     |
| <i>Coprobacter fastidiosus</i>          | 3 (0.5–41)           | 10.5 (1–34)       | 0.540           | 565             | 504               | 27                  | 35                     |
| <i>Coprococcus eutactus</i>             | 41.5 (2–226)         | 31 (0–176.5)      | 0.366           | 1173            | 1676              | 34                  | 26                     |
| <i>Dialister invisus</i>                | 2 (0–20.5)           | 4.5 (2–393)       | <b>0.043</b>    | 3245            | 4131              | 26                  | 34                     |
| <i>Dialister succinatiphilus</i>        | 2.5 (0.5–81.5)       | 0 (0–2.5)         | <b>0.015</b>    | 4047            | 1831              | 27                  | 16                     |
| <i>Eubacterium coprostanoligenes</i>    | 57 (18–229.5)        | 70.5 (30.5–160)   | 0.982           | 1870            | 822               | 33                  | 36                     |
| <i>Eubacterium hallii</i>               | 6.5 (3–13.5)         | 9.5 (5.5–14.5)    | 0.160           | 82              | 167               | 34                  | 36                     |
| <i>Faecalibacterium prausnitzii</i>     | 968.5 (566.5–1774.5) | 637 (439.5–1165)  | <b>0.077</b>    | 11675           | 5289              | 36                  | 36                     |
| <i>Finegoldia magna</i>                 | 43.5 (33–63)         | 44 (31–53)        | 0.673           | 136             | 113               | 36                  | 36                     |
| <i>Gemmiger formicilis</i>              | 14.5 (5.5–36)        | 34 (17.5–54.5)    | 0.038           | 172             | 163               | 35                  | 34                     |
| <i>Holdemanella bififormis</i>          | 1 (0–33)             | 0 (0–38.5)        | 0.635           | 484             | 653               | 22                  | 17                     |
| <i>Leptolyngbya boryana</i>             | 92 (47–149.5)        | 85.5 (59.5–141.5) | 0.822           | 320             | 475               | 36                  | 36                     |
| <i>Megasphaera elsdenii</i>             | 1.5 (0–5)            | 1 (0–3.5)         | 0.496           | 2240            | 875               | 25                  | 23                     |
| <i>Odoribacter splanchnicus</i>         | 48 (19.5–110.5)      | 46 (18–105)       | 0.879           | 205             | 475               | 35                  | 33                     |
| <i>Parabacteroides distasonis</i>       | 191 (77–326.5)       | 175 (87–518.5)    | 0.669           | 3176            | 2999              | 35                  | 33                     |
| <i>Parabacteroides merdae</i>           | 15.5 (2.5–29.5)      | 12.5 (1–63)       | 0.721           | 260             | 230               | 29                  | 28                     |
| <i>Paraprevotella clara</i>             | 1 (0–258.5)          | 1 (0–123.5)       | 0.803           | 1532            | 2634              | 20                  | 25                     |
| <i>Paraprevotella xylaniphila</i>       | 0.5 (0–4)            | 0 (0–1.5)         | 0.207           | 108             | 35                | 18                  | 13                     |
| <i>Parasutterella excrementihominis</i> | 6 (1–15)             | 13 (3.5–96.5)     | <b>0.043</b>    | 1798            | 979               | 28                  | 33                     |
| <i>Phascolarctobacterium faecium</i>    | 9.5 (1–484.5)        | 3 (1–401)         | 0.675           | 1688            | 2595              | 29                  | 28                     |

| Species                                 | Vegans          | Omnivores       | <i>p</i> -Value | Vegans<br>(Max) | Omnivore<br>(Max) | Presence<br>(Vegan) | Presence<br>(Omnivore) |
|-----------------------------------------|-----------------|-----------------|-----------------|-----------------|-------------------|---------------------|------------------------|
| <i>Phascolarctobacterium succinatut</i> | 1 (0–3)         | 2 (0–4.5)       | 0.377           | 1688            | 2595              | 29                  | 28                     |
| <i>Planktothrix suspensa</i>            | 35.5 (18–59)    | 26.5 (16–77.5)  | 0.648           | 273             | 237               | 36                  | 36                     |
| <i>Prevotella copri</i>                 | 19 (8.5–5250.5) | 19 (9–1640.5)   | 0.765           | 18976           | 12158             | 35                  | 35                     |
| <i>Prevotella stercorea</i>             | 1 (0–6)         | 1 (0–2.5)       | 0.393           | 1876            | 923               | 26                  | 25                     |
| <i>Ruminococcus bromii</i>              | 52.5 (2.5–114)  | 64.5 (22–146.5) | 0.477           | 2004            | 1277              | 32                  | 31                     |
| <i>Ruminococcus callidus</i>            | 17.5 (0–35.5)   | 5.5 (0–27.5)    | 0.346           | 83              | 105               | 26                  | 24                     |
| <i>Sutterella stercoricanis</i>         | 1 (0–40.5)      | 0 (0–4.5)       | 0.106           | 713             | 597               | 23                  | 15                     |
| <i>Sutterella wadsworthensis</i>        | 26.5 (2.5–153)  | 17 (1–76)       | 0.312           | 634             | 1475              | 32                  | 28                     |

Median (Q1–Q3) abundances of species presented as number of reads resulting from 16S rRNA sequencing. Only taxa were included that were present in at least 50% of participants with vegan or omnivorous diet and with an absolute abundance of 100 reads in at least one participant. Significant differences with  $p \leq 0.05$  were marked in bold.

**Supplementary Table S4.** Abundances of taxa at genus level in vegans and omnivores.

| Genus                         | Vegans               | Omnivores             | <i>p</i> -Value | Vegan (Max) | Omnivore (Max) | Presence (Vegan) | Presence (Omnivore) |
|-------------------------------|----------------------|-----------------------|-----------------|-------------|----------------|------------------|---------------------|
| <i>Bacteroides</i>            | 6352 (1986.2–8377.8) | 6094 (3214.8–11222.2) | 0.374           | 20765       | 25858          | 36               | 36                  |
| <i>Butyricimonas</i>          | 25.5 (1.8–71.2)      | 19 (8.5–53.8)         | 0.982           | 261         | 2448           | 28               | 30                  |
| <i>Odoribacter</i>            | 62 (22.5–115.5)      | 46.5 (21.5–110)       | 0.817           | 213         | 487            | 35               | 34                  |
| <i>Barnesiella</i>            | 223 (23.8–826)       | 327.5 (160–655.2)     | 0.424           | 3400        | 3121           | 34               | 36                  |
| <i>Copro bacter</i>           | 3 (0.8–38.5)         | 10.5 (1–32.5)         | 0.540           | 199         | 469            | 27               | 28                  |
| <i>Parabacteroides</i>        | 454.5 (251.2–698)    | 550.5 (286.5–1189.8)  | 0.295           | 3254        | 5315           | 36               | 35                  |
| <i>Alloprevotella</i>         | 1 (0–2)              | 0.5 (0–2)             | 0.801           | 2053        | 2983           | 20               | 18                  |
| <i>Paraprevotella</i>         | 22 (0–281.2)         | 3 (1–135)             | 0.510           | 1629        | 2824           | 26               | 28                  |
| <i>Prevotella</i>             | 157.5 (27–6527.8)    | 56.5 (25.8–2219.8)    | 0.398           | 22873       | 15903          | 36               | 35                  |
| <i>Alistipes</i>              | 638.5 (261.2–1248.8) | 752.5 (519.2–1713.2)  | 0.311           | 3360        | 4569           | 36               | 36                  |
| <i>Parasutterella</i>         | 6 (1–14.5)           | 13 (3.8–78.8)         | <b>0.045</b>    | 1798        | 982            | 28               | 33                  |
| <i>Sutterella</i>             | 76 (22.8–242.2)      | 49 (3–169.2)          | 0.330           | 906         | 2116           | 34               | 33                  |
| <i>Desulfovibrio</i>          | 39.5 (16–75.8)       | 47.5 (14.8–150.8)     | 0.401           | 648         | 901            | 32               | 34                  |
| <i>Haemophilus</i>            | 2.5 (1–11.5)         | 0 (0–4)               | <b>0.027</b>    | 216         | 100            | 28               | 17                  |
| <i>Akkermansia</i>            | 31 (3–603.5)         | 37 (1–521.8)          | 0.426           | 4197        | 3591           | 35               | 30                  |
| <i>Bifidobacterium</i>        | 147 (59.2–343.8)     | 91 (27.5–341.2)       | 0.395           | 3254        | 9975           | 35               | 36                  |
| <i>Collinsella</i>            | 22.5 (6.2–45.5)      | 32 (13.2–55.8)        | 0.423           | 382         | 913            | 31               | 32                  |
| <i>Planktothrix</i>           | 35.5 (19–59)         | 26.5 (16–75.8)        | 0.648           | 273         | 237            | 36               | 36                  |
| <i>Leptolyngbya</i>           | 92 (47.5–147.8)      | 85.5 (60.8–140.8)     | 0.822           | 320         | 475            | 36               | 36                  |
| <i>Lactobacillus</i>          | 8 (4–31.8)           | 5 (2.8–10.2)          | 0.051           | 106         | 70             | 36               | 34                  |
| <i>Streptococcus</i>          | 8 (5–36.8)           | 16.5 (6.8–40)         | 0.318           | 306         | 185            | 34               | 36                  |
| <i>Butyricococcus</i>         | 114.5 (52.5–209.2)   | 45.5 (26–92.8)        | <b>0.002</b>    | 520         | 307            | 36               | 36                  |
| <i>Clostridium</i>            | 29.5 (18.5–56.8)     | 22.5 (11.8–43.2)      | 0.248           | 660         | 162            | 36               | 36                  |
| <i>Eubacterium</i>            | 113 (59–231)         | 92.5 (63.8–199.2)     | 0.848           | 1918        | 863            | 36               | 36                  |
| <i>Anaerostipes</i>           | 19 (6.8–34.8)        | 17 (9–32)             | 0.964           | 375         | 413            | 36               | 36                  |
| <i>Blautia</i>                | 83.5 (42.5–145)      | 101.5 (54.8–151.5)    | 0.536           | 435         | 362            | 36               | 36                  |
| <i>Butyrivibrio</i>           | 1 (0–3)              | 1.5 (0.8–3)           | 0.467           | 2338        | 1118           | 22               | 27                  |
| <i>Coprococcus</i>            | 49 (12.8–227.8)      | 38 (5–181.8)          | 0.333           | 1177        | 1696           | 36               | 33                  |
| <i>Lachnoclostridium</i>      | 973 (475.8–1259.2)   | 1091 (445.2–1946.8)   | 0.437           | 4292        | 3781           | 36               | 36                  |
| <i>Roseburia</i>              | 88.5 (47–219.5)      | 77.5 (40.2–162)       | 0.285           | 1314        | 630            | 36               | 36                  |
| <i>Tyzzerella</i>             | 21 (12.5–44)         | 15 (5.8–25)           | 0.107           | 127         | 463            | 36               | 34                  |
| <i>Oscillibacter</i>          | 224 (172–377.2)      | 273 (182.8–358.8)     | 0.915           | 1073        | 1251           | 36               | 36                  |
| <i>Anaerofilum</i>            | 25 (15–55)           | 39.5 (22.2–57.8)      | 0.338           | 185         | 130            | 35               | 36                  |
| <i>Faecalibacterium</i>       | 968.5 (580.8–1764.2) | 637 (440.2–1105)      | 0.077           | 11675       | 5289           | 36               | 36                  |
| <i>Gemmiger</i>               | 14.5 (5.8–35)        | 34 (18.2–51.8)        | 0.038           | 172         | 163            | 35               | 34                  |
| <i>Ruminiclostridium</i>      | 113 (39.5–193.8)     | 96.5 (66.5–126.2)     | 0.437           | 422         | 292            | 36               | 36                  |
| <i>Ruminococcus</i>           | 245 (124.2–373.2)    | 325.5 (96.5–614.5)    | 0.532           | 2567        | 1741           | 35               | 36                  |
| <i>Erysipelatoclostridium</i> | 13 (7–37)            | 29.5 (7–44)           | 0.327           | 166         | 185            | 35               | 35                  |
| <i>Holdemanella</i>           | 1 (0–30.5)           | 0 (0–38.2)            | 0.635           | 484         | 653            | 22               | 17                  |
| <i>Acidaminococcus</i>        | 2 (0–7.5)            | 2.5 (0–6.5)           | 0.840           | 324         | 727            | 22               | 24                  |
| <i>Phascolarctobacterium</i>  | 72.5 (1.8–524)       | 21.5 (1–679.5)        | 0.955           | 1701        | 2613           | 33               | 31                  |
| <i>Dialister</i>              | 392 (6.8–1172.8)     | 252 (6.8–1283.5)      | 0.822           | 4591        | 4640           | 34               | 36                  |
| <i>Megasphaera</i>            | 2 (0.8–5.2)          | 1 (0–4)               | 0.275           | 2295        | 919            | 27               | 23                  |

| Genus              | Vegans         | Omnivores    | <i>p</i> -Value | Vegan<br>(Max) | Omnivore<br>(Max) | Presence<br>(Vegan) | Presence<br>(Omnivore) |
|--------------------|----------------|--------------|-----------------|----------------|-------------------|---------------------|------------------------|
| <i>Veillonella</i> | 8 (4–21.2)     | 7 (4–13)     | 0.491           | 169            | 626               | 36                  | 35                     |
| <i>Finegoldia</i>  | 43.5 (33.5–63) | 44 (31–51.5) | 0.673           | 136            | 113               | 36                  | 36                     |
| <i>Spiroplasma</i> | 6.5 (0–30.2)   | 0 (0–12)     | <b>0.047</b>    | 241            | 95                | 24                  | 17                     |

Median (Q1–Q3) abundances of genera presented as number of reads resulting from 16S rRNA sequencing. Only taxa were included that were present in at least 50% of participants with vegan or omnivorous diet and with an absolute abundance of 100 reads in at least one participant. Significant differences with  $p \leq 0.05$  were marked in bold.
